# Supplementary material for: Comprehensive Serum Glycopeptide Spectra Analysis (CSGSA): A Potential New Tool for Early Detection of Ovarian Cancer
Source: PubMed Central journal article supplement (PMC6563019; doi:10.3390/cancers11050591), 2019-04-27
Supplement: cancers-11-00591-s001.pdf [file cancers-11-00591-s001.pdf]

# Comprehensive Serum Glycopeptide Spectra Analysis (CSGSA): A Potential New Tool for Early Detection of Ovarian Cancer

Masaru Hayashi, Koji Matsuo, Kazuhiro Tanabe, Masae Ikeda, Mariko Miyazawa, Miwa Yasaka, Hiroko Machida, Masako Shida, Tadashi Imanishi, Brendan H. Grubbs, Takeshi Hirasawa and Mikio Mikami

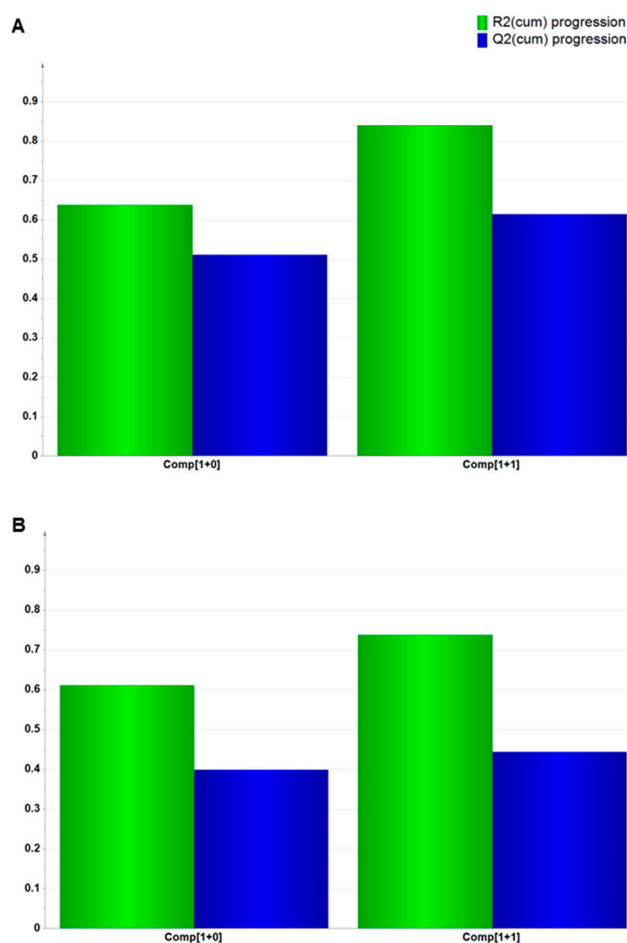

**Figure S1.** Validation sets for OPLS-DA. Model fit plots represent the results of cumulative percentages of variation of the data set (R2) and predictive values (Q2) using cross validation for first and second OPLS-DA components. (A) showed the study of early-stage EOC versus non-cancer, and (B) represents the study of early-stage OCCC versus endometrioma.

**Table S1.** Patient demographics.

| Characteristic           | Number (%)           | Age                 |
|--------------------------|----------------------|---------------------|
| Benign disease           | <i>n</i> = 45 (100%) |                     |
| Endometrioma             | 18 (40.0%)           | 43.78 ( $\pm$ 5.48) |
| Ovarian cyst             | 17 (37.8%)           | 54.41 ( $\pm$ 13.4) |
| Leiomyoma                | 10 (22.2%)           | 51.0 ( $\pm$ 10.1)  |
| Ovarian cancer           | <i>n</i> = 39 (100%) | 53.72 ( $\pm$ 10.3) |
| Histology type           |                      |                     |
| Clear cell               | 15 (38.5%)           | 52.47 ( $\pm$ 11.4) |
| Endometrioid             | 14 (35.8%)           | 53.71 ( $\pm$ 10.3) |
| Serous                   | 8 (20.5%)            | 54.13 ( $\pm$ 9.8)  |
| Mucinous                 | 2 (5.1%)             | 61.50 ( $\pm$ 6.3)  |
| Stage                    |                      |                     |
| I                        | 21 (53.8%)           |                     |
| II                       | 2 (5.1%)             |                     |
| III                      | 15 (38.5%)           |                     |
| IV                       | 1 (2.6%)             |                     |
| Histology-specific stage |                      |                     |
| Clear cell               |                      |                     |
| I–II                     | 9 (60.0%)            |                     |
| III–IV                   | 6 (40.0%)            |                     |
| Endometrioid             |                      |                     |
| I–II                     | 10 (71.4%)           |                     |
| III–IV                   | 4 (28.6%)            |                     |
| Serous                   |                      |                     |
| I–II                     | 3 (37.5%)            |                     |
| III–IV                   | 5 (62.5%)            |                     |
| Mucinous                 |                      |                     |
| I–II                     | 1 (50%)              |                     |
| III–IV                   | 1 (50%)              |                     |

**Table S2.** Exclusion criteria.

|                                                                                                               |
|---------------------------------------------------------------------------------------------------------------|
| A history of hormonal drug administration due to malignant tumor, autoimmune disease, and thyroid abnormality |
| Affected by combination of several types of cancers                                                           |
| Abnormal values in blood tests. WBC: >9600, PLT: >48, LDH: >263, HB: <9.2 and CRP >3.0                        |
| Renal dysfunction                                                                                             |
| Liver dysfunction                                                                                             |
| Aged 75 and above                                                                                             |
| Diagnosed as mixed carcinoma                                                                                  |
| Diagnosed as fallopian tube cancer/peritoneal cancer                                                          |
| Affected massive ascites/pleural effusion                                                                     |
| Diagnosed as mucinous cystadenoma, germ cell tumor or sex cord stromal tumor                                  |

*Supplementary Method S1***Serum Preparation**

For this study, 10  $\mu$ L of a 2 mg/mL aqueous solution of fetal calf fetuin (Sigma, St. Louis, MO, USA) was added to each serum sample (20  $\mu$ L) to check the efficiency of trypsin digestion or the recovery of glycopeptides. Subsequently, trichloroacetic acid in acetone (100 mg/mL, 120  $\mu$ L; Wako Pure Chemical Industries, Ltd, Osaka, Japan) was added to remove serum albumin. After mixing and centrifuging at 13,500 $\times$  *g* for 5 min, the supernatant was removed, and cooled acetone (400  $\mu$ L) was added to remove excess trichloroacetic acid. The suspension was centrifuged again at 13,500 $\times$  *g* for 5 min, and the supernatant was removed. Finally, the precipitate was mixed with denaturing solution containing urea (80  $\mu$ g; Wako Pure Chemical Industries), Tris-HCl buffer (pH 8.5, 100  $\mu$ L), 0.1 M

EDTA solution (10  $\mu\text{L}$ ), 1 M Tris (2-carboxyethyl) phosphine hydrochloride (5  $\mu\text{L}$ ; Sigma) solution, and water (38  $\mu\text{L}$ ), and proteins were denatured for 10 min at 37 °C. Next, 1 M 2-iodoacetamide (40  $\mu\text{L}$ ; Wako Pure Chemical Industries) solution was added to the denaturing solution to protect the thiol residues in proteins. The solution was kept for 10 min at 37 °C in the dark, subsequently transferred into a 30 K ultrafiltration tube (Amicon Ultra 0.5 mL; Millipore Corp., Billerica, MA, USA) and centrifuged at 13,500 $\times$   $g$  for 30 min to remove denaturing reagents. The denatured proteins trapped on the filter were washed with 0.1 M Tris-HCl buffer (pH 8.5, 400  $\mu\text{L}$ ), followed by centrifugation at 13,500 $\times$   $g$  for 40 min. Next, 0.1 M Tris-HCl buffer (pH 8.5, 200  $\mu\text{L}$ ), 0.1  $\mu\text{g}/\mu\text{L}$  trypsin (20  $\mu\text{L}$ ; Wako Pure Chemical Industries) solution, and 0.1  $\mu\text{g}/\mu\text{L}$  lysyl endopeptidase (20  $\mu\text{L}$ ; Wako Pure Chemical Industries) solution were added to the ultrafiltration tube, and the denatured proteins on the filters were digested for 16 h at 37 °C. After digestion, the solution was centrifuged for 30 min at 13,500 $\times$   $g$ . The filtered solution, which contained digested peptides (including glycopeptides), was transferred to a 10 K ultrafiltration tube (Amicon Ultra 0.5 mL; Millipore Corp.) and centrifuged for 10 min at 13,500 $\times$   $g$ . Most glycopeptides were trapped on the 10 K ultra-filter, whereas most non-glycosylated peptides were filtered [15]. The trapped glycopeptide fraction was washed with 10 mM ammonium acetate in 10% ( $v/v$ ) acetonitrile solution (400  $\mu\text{L}$ ), transferred to a 1.5-mL tube, and subjected to drying via vacuum centrifugation. Glycopeptides trapped on the filter were recovered and analyzed by UPLC-MS/MS.

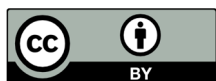

© 2019 by the authors. Licensee MDPI, Basel, Switzerland. This article is an open access article distributed under the terms and conditions of the Creative Commons Attribution (CC BY) license (<http://creativecommons.org/licenses/by/4.0/>).
